# Supplementary material for: Plasma enhanced atomic layer deposition of Fe2O3 thin films
Source: Royal Society of Chemistry journal article supplement (doi:10.1039/c4ta01486c), 2014-01-01
Supplement: c4ta01486c1.pdf [file c4ta01486c1.pdf]

Electronic Supplementary Information (ESI) for Journal of Materials Chemistry A

## **Plasma enhanced atomic layer deposition of Fe<sub>2</sub>O<sub>3</sub> thin films**

Ranjith K. Ramachandran, Jolien Dendooven, and Christophe Detavernier\*

*Department of Solid State Sciences, COCOON, Ghent University, Krijgslaan  
281/S1, 9000 Ghent, Belgium,*

A series of depositions were carried out at 200 °C with different number of ALD cycles. The thickness of the films was measured with X-ray reflectivity (XRR). Excellent fits for the XRR spectra were obtained by assuming the film density equal to the one of bulk  $\alpha$ -Fe<sub>2</sub>O<sub>3</sub> (5.27g/cm<sup>3</sup>)<sup>1</sup>. X-ray fluorescence measurements were done on each sample and a linear relationship was obtained by plotting the integrated area under the Fe K $\alpha$  peak against the thickness (Figure S1). This linear relationship was used for extracting the thickness of the films deposited at and above 350 °C and the thicker films deposited at 300 °C.

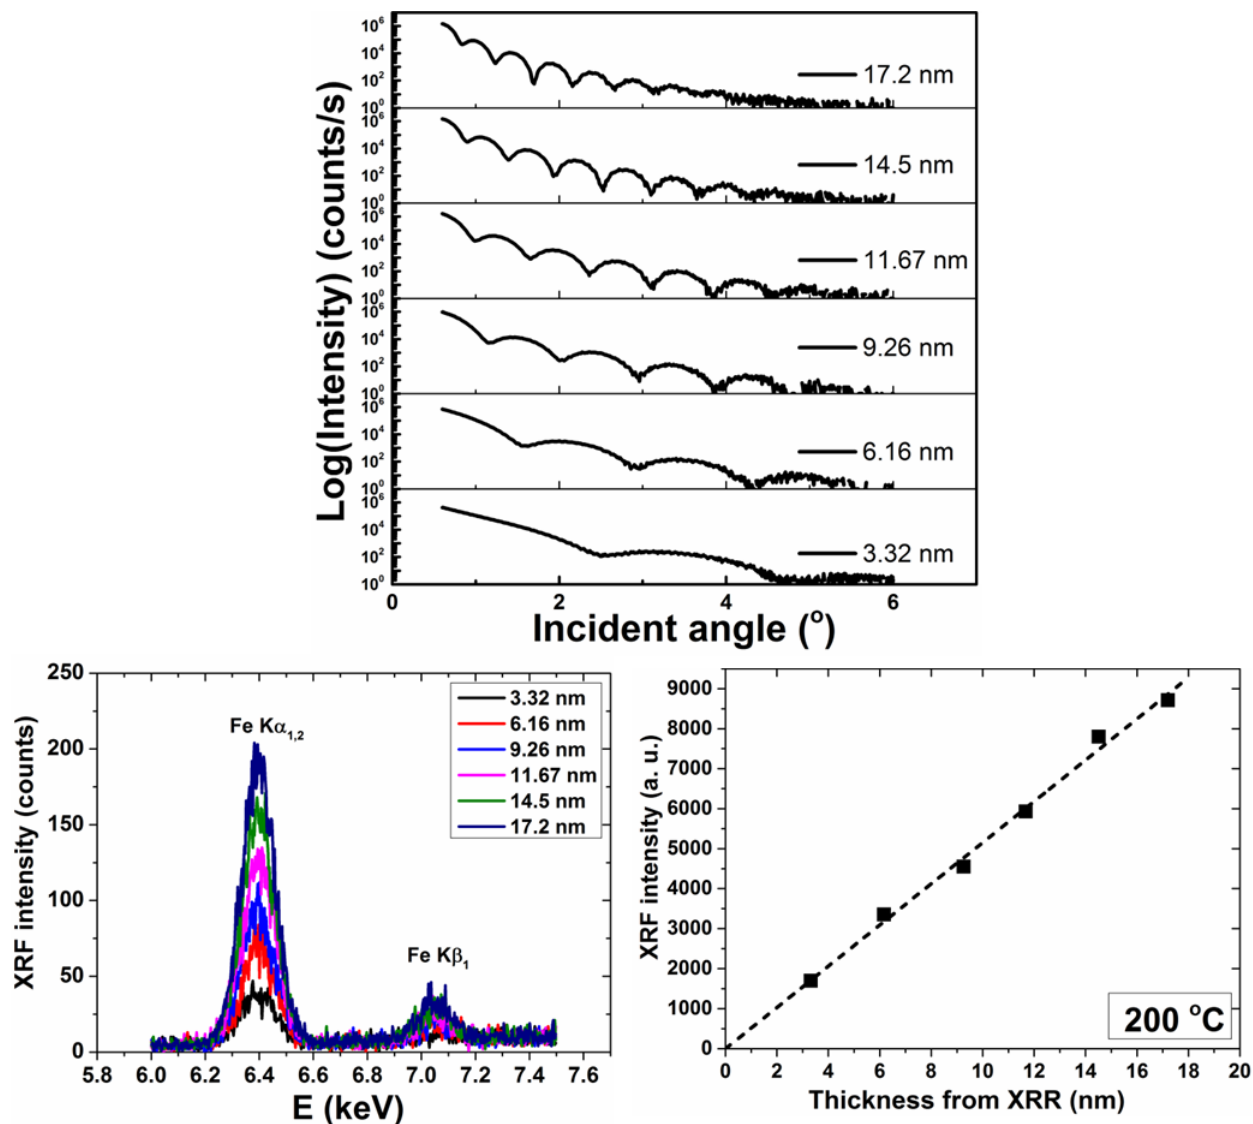

**Figure S1.** XRR (top) and XRF (bottom left) signals of Fe<sub>2</sub>O<sub>3</sub> thin films with different thicknesses deposited on SiO<sub>2</sub> substrates at 200 °C. The thickness against the integrated XRF intensity over Fe K $\alpha$  signal is plotted in the bottom right figure.

## References

- 1 M. Lie, H. Fjellvåg, and a. Kjekshus, *Thin Solid Films*, 2005, **488**, 74–81
